# Supplementary material
Source: PubMed Central journal article supplement (PMC4461229)
Supplement: NIHMS696599-supplement-Supplemental.pdf [file NIHMS696599-supplement-Supplemental.pdf]

**The DNA replication FoSTeS/MMBIR mechanism can generate human  
genomic, genic, and exonic complex rearrangements**

Feng Zhang<sup>1</sup>, Mehrdad Khajavi<sup>1</sup>, Anne M. Connolly<sup>4</sup>, Charles F. Towne<sup>5</sup>, Sat Dev Batish<sup>5</sup>,  
James R. Lupski<sup>1,2,3</sup>

<sup>1</sup>Department of Molecular and Human Genetics, Baylor College of Medicine, Houston, TX, 77030, USA. <sup>2</sup>Department of Pediatrics, Baylor College of Medicine, Houston, TX, 77030, USA. <sup>3</sup>Texas Children's Hospital, Houston, TX, 77030, USA. <sup>4</sup>Department of Neurology, Washington University School of Medicine, Saint Louis, MO 63110, USA. <sup>5</sup>Athena Diagnostics, Inc., Worcester, MA 01605, USA

Correspondence should be addressed to Dr. James R. Lupski (jlupski@bcm.tmc.edu)

## **Supplementary Information**

Supplementary Tables 1 to 4

Supplementary Figs. 1 to 10 with Legends

References

**Supplementary Table 1. Characteristics of the simple nonrecurrent rearrangements in 17p**

| Scale   | Sample | Rearrangement | Size    | Microhomology |
|---------|--------|---------------|---------|---------------|
| Genomic | 2661   | dup           | 11.2 Mb | AT            |
|         | 1861   | dup           | 7.7 Mb  | N.A.          |
|         | 2488   | dup           | 7.5 Mb  | N.A.          |
|         | 2362   | dup           | 7.0 Mb  | N.A.          |
|         | 2440   | dup           | 4.9 Mb  | N.A.          |
| Exonic  | A10    | del           | 16.8 kb | GATT          |
|         | A21    | del           | 11.6 kb | C             |
|         | A11    | del           | 7.2 kb  | AC            |
|         | A14    | del           | 212 bp  | GC            |
|         | A12    | del           | 9 bp    | GACG          |

Abbreviation: del, deletion; dup, duplication; N.A., not available.

**Supplementary Table 2. Five out of 23 (22%) CNV breakpoints sequenced in Perry *et al.*<sup>1</sup> show sequence complexities consistent with two or more FoSTeS/MMBIR events**

| Example | Genomic location | FoSTeS events | Microhomology              |
|---------|------------------|---------------|----------------------------|
| 1       | 2q21.1           | ×2            | GAGG, CA                   |
| 2       | 2q32.3           | ×4            | GAAGT, AATTC, ATTT, AAAACA |
| 3       | 3q22.1           | ×2            | CT, TG                     |
| 4       | 4q26             | ×2            | TTA, GAATA                 |
| 5       | 5q33.1           | ×2            | CAA, TCT                   |

**Supplementary Table 3. Reported complex gene rearrangements consistent with multiple FoSTeS/MMBIR events (<http://www.hgmd.cf.ac.uk/ac/index.php>)**

| Gene            | Genomic location | Exon(s) involved | Events | Microhomology                         | Reference |
|-----------------|------------------|------------------|--------|---------------------------------------|-----------|
| <i>SLC3A1</i> * | 2p21             | ex 2             | ×2     | CTT, AAA                              | 2         |
| <i>ATP2C1</i>   | 3q22.1           | ex 20            | ×2     | AG, TGTGT                             | 3         |
| <i>FOXL2</i>    | 3q22.3           | ex 1             | ×2     | GC, GCAGCCGCGG                        | 4         |
| <i>DSPP</i>     | 4q22.1           | ex 5             | ×2     | AGCAG,<br>AGCAGTGACAGCA               | 5         |
| <i>HPS1</i>     | 10q24.2          | ex 12-20         | ×2     | GTTACTGGG,<br>CCCCTCAGAGCC            | 6         |
| <i>HNF1B</i>    | 17q12            | ex 5             | ×2     | TATT, AACA                            | 7         |
| <i>BRCA1</i>    | 17q21.31         | ex 21, 22        | ×2     | CCT, CACTGCACTCCA-<br>GCCTGGGTGACAGAG | 8         |
| <i>SLC5A5</i> * | 19p13.11         | ex 3-6           | ×2     | CATC, AC                              | 9         |
| <i>PRPF31</i>   | 19q13.42         | ex 1             | ×2     | AAC, TCCTGGG                          | 10        |
| <i>OFD1</i> *   | Xp22.2           | ex 7-9           | ×2     | TCA, CTCAA                            | 11        |
| <i>IL2RG</i>    | Xq13.1           | ex 4             | ×2     | TG, GTGA                              | 12        |
| <i>GLA</i> *    | Xq22.1           | ex 5-7           | ×2     | AC, AT                                | 13        |
| <i>F9</i> *     | Xq27.1           | ex 4             | ×2     | ATT, CAAAAA                           | 14        |
| <i>F8</i> *     | Xq28             | ex 16            | ×2     | AACT, TCA                             | 15        |
| <i>IDS</i> *    | Xq28             | ex 5-7           | ×4     | AATACATTT, GA,<br>CAAGAG, CA          | 16        |
| <i>LICAM</i>    | Xq28             | ex 2             | ×2     | GCT, GC                               | 17        |
| <i>MECP2</i> *  | Xq28             | ex 4             | ×2     | CC, AGCCC                             | 18        |

\*Some complex gene rearrangements have been hypothesized to be caused by “serial replication slippage”<sup>19,20</sup>, an alternative replication-based model proposed for small complex rearrangements.

**Supplementary Table 4. Primers of achieved long-range PCR amplifications and the breakpoint junction products for sequencing in a proportion of nonrecurrent rearrangements on 17p**

| Sample | Primer coordinate (+/- strand), UCSC hg18 |                              | Size of product for Sequencing (kb) |
|--------|-------------------------------------------|------------------------------|-------------------------------------|
|        | Forward                                   | Reverse                      |                                     |
| 563    | chr17:20775964-20775983 (+)               | chr17:15225900-15225920 (-)  | 1.3                                 |
| 621    | chr17:17034792-17034812 (+)               | chr17:17021067-17021090 (-)  | 0.5                                 |
|        | chr17:17033028-17033053 (+)               | Same with the forward primer | 10                                  |
| 1229   | chr17:15015801-15015820 (+)               | chr17:15054771-15054791 (-)  | 0.5                                 |
| 2661   | chr17:19124269-19124292 (+)               | chr17:7977899-7977918 (-)    | 4.2                                 |
| 2695   | chr17:16174939-16174959 (+)               | chr17:16137968-16137993 (-)  | 3.9                                 |
| 2711   | chr17:10870486-10870509 (+)               | chr17:10955976-10955998 (-)  | 2.0                                 |
| A10    | chr17:15078686-15078705 (+)               | chr17:15096288-15096307 (-)  | 0.8                                 |
| A11    | chr17:15096041-15096060 (+)               | chr17:15104032-15104052 (-)  | 0.8                                 |
| A12    | chr17:15104214-15104233 (+)               | chr17:15105252-15105272 (-)  | 1.1                                 |
| A14    | chr17:15104214-15104233 (+)               | chr17:15105252-15105272 (-)  | 0.9                                 |
| A15    | chr17:15079113-15079132 (+)               | chr17:15088798-15088817 (-)  | 1.1                                 |
| A21    | chr17:15093195-15093218 (+)               | chr17:15105743-15105764 (-)  | 1.0                                 |

## Structure 1

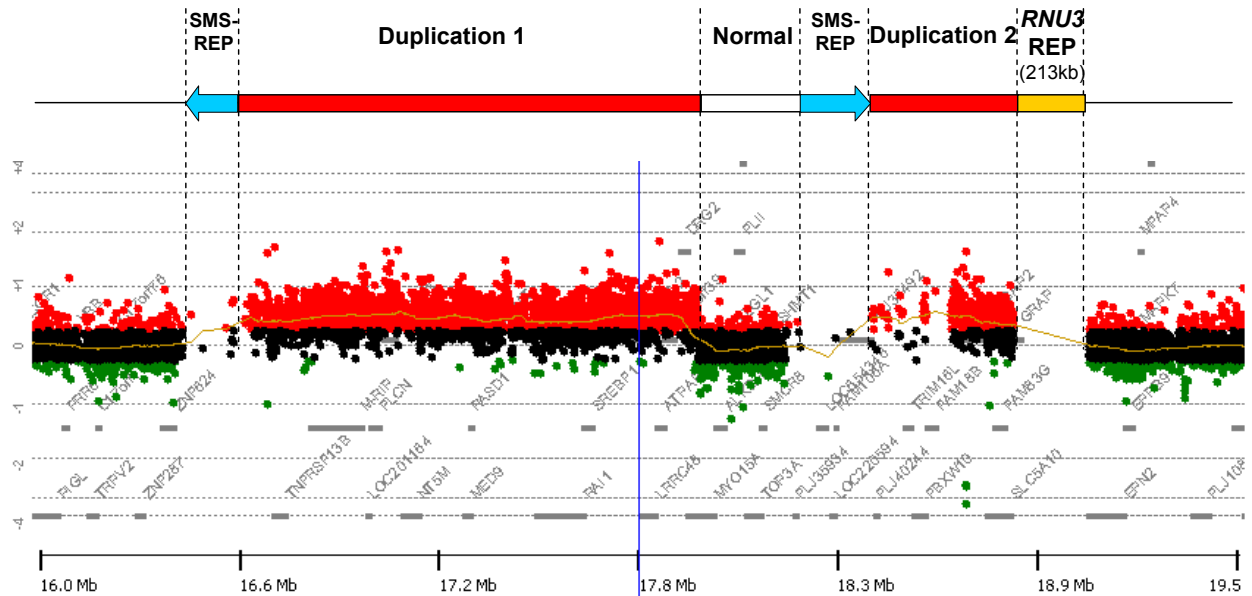

## Structure 2

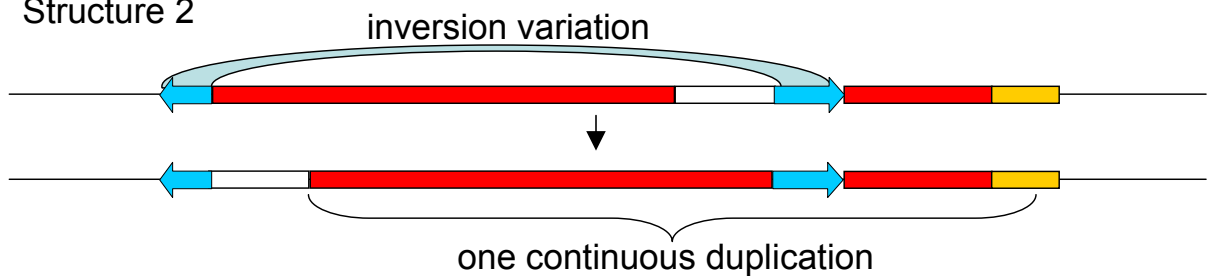

**Supplementary Figure 1.** Rearrangement for patient 2543. Oligonucleotide aCGH revealed a complex rearrangement with two separate duplications (structure 1) in patient 2543. Since NAHR between the SMS repeats (distal and middle SMS-REPs in reverse orientation) can lead to an inversion allele and such an inversion variation has been reported<sup>21</sup>, the complexity in patient 2543 can alternatively be caused by a single duplication that occurred on an inversion allele (structure 2).

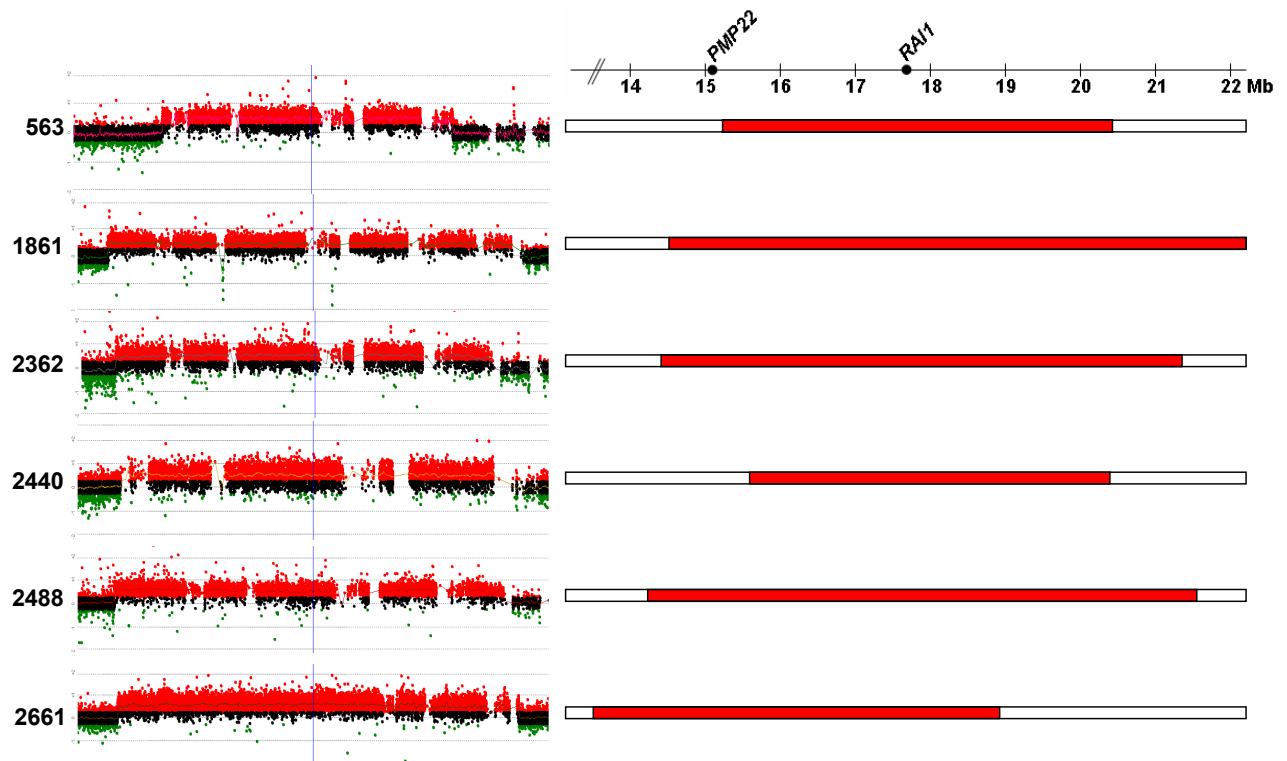

**Supplementary Figure 2.** No sequence complexity was found in 6 out of 14 nonrecurrent 17p11.2 duplications based on oligonucleotide aCGH. Further breakpoint sequence analyses revealed the FoSTeS/MMBIR-mediated complexity in patient 563.



Patient 2661

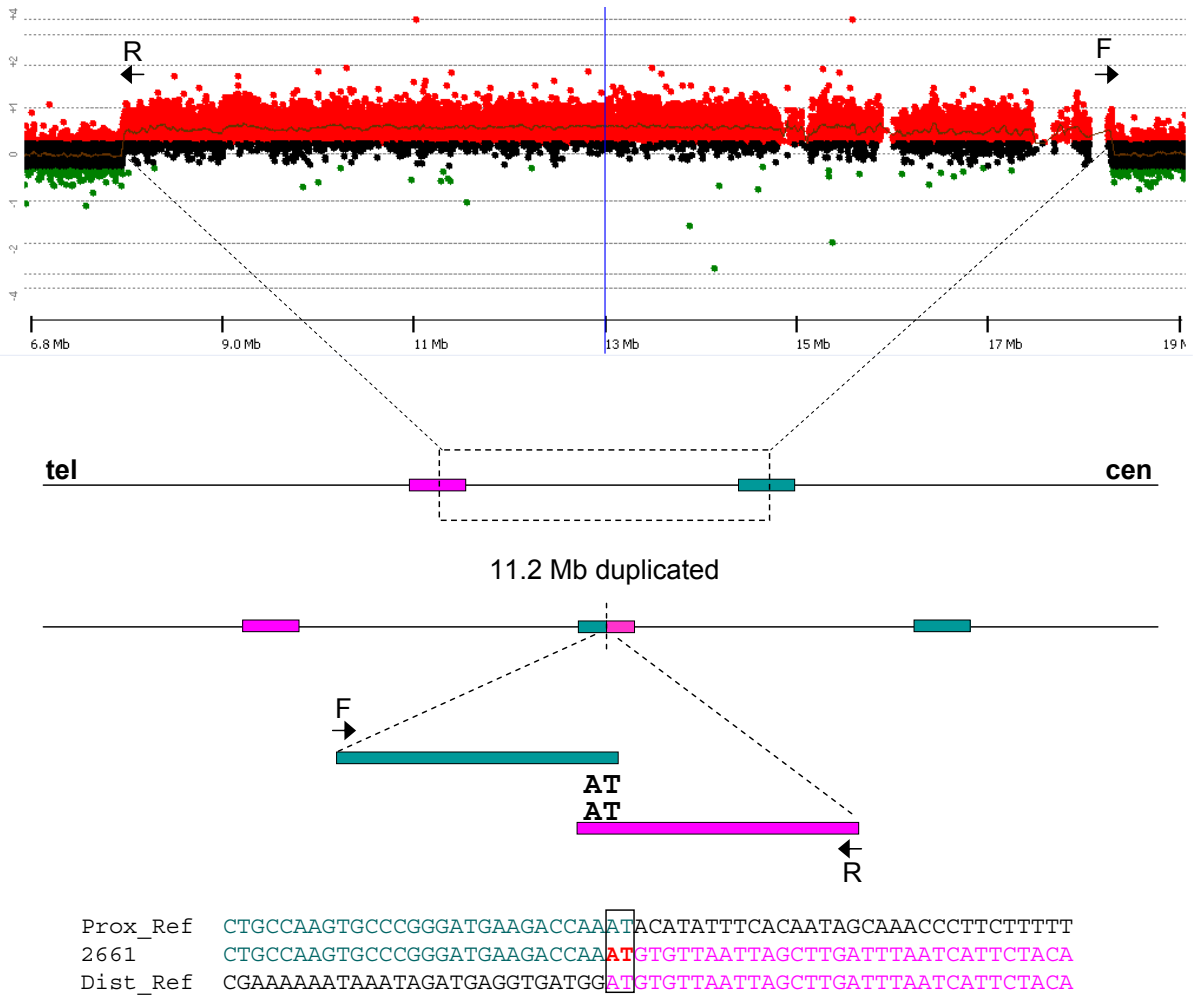

**Supplementary Figure 3.** Junction sequence analysis of the duplication identified in 2661. Two base-pairs of microhomology (AT) were found at the breakpoint.

## Patient 621

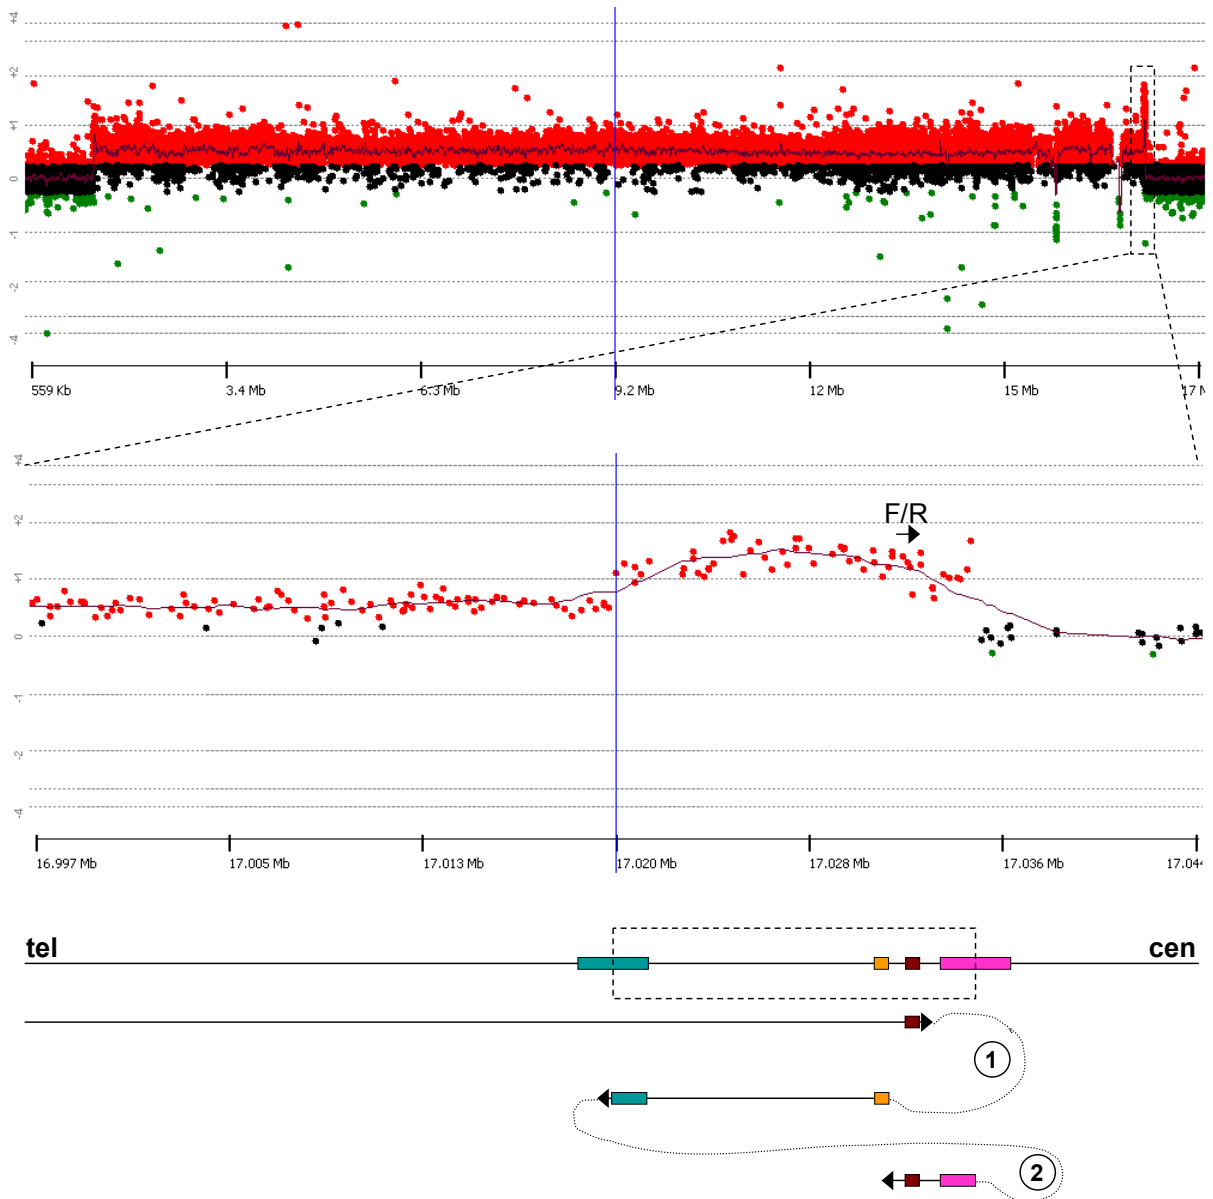

### FoSTeS 1

ProxRef1+ CAGGATGGTCTCGATTTCTGACCTCGTGATCCGCTGTCTCGGCCTCCCAAAGTGCTGGGATTACAGGC  
 621\_1+ CAGGATGGTCTCGATTTCTGACCTCGTGATCCG**CC**CAGCCAGGGGTTTATACTCCCTATCTTAATGGGAT  
 DistRef2- CCACCTTGCTCCTAAAGTAGCAGAACCTGTTCCA**CC**CAGCCAGGGGTTTATACTCCCTATCTTAATGGGAT

### FoSTeS 2

ProxRef2+ ATGTTTTTAATGACTGCTGCATCTTTGTAAAACGTT**TTGGT**CATCTAACAGATGGTTTTAAAGTGTACAAT  
 621\_2- ATGTTTTTAATGACTGCTGCATCTTTGTAAAACGTT**TTGGT**GGTCACTCAGTCACCTAGGGAATCTAGGAC  
 DistRef2+ AGGGACTCCTGGAGTCAGGGGAGATGACAGAATCA**TTGGT**GGTCACTCAGTCACCTAGGGAATCTAGGAC

**Supplementary Figure 4.** Sequence analysis of one breakpoint junction of the complex rearrangement in patient 621. An about 10 kb junction product was amplified by only one primer at the proximal end (with respect to the reference sequence) of the complex rearrangement region. Sequencing analysis revealed two of the FoSTeS/MMBIR events causing complexity.

## Patient 1229

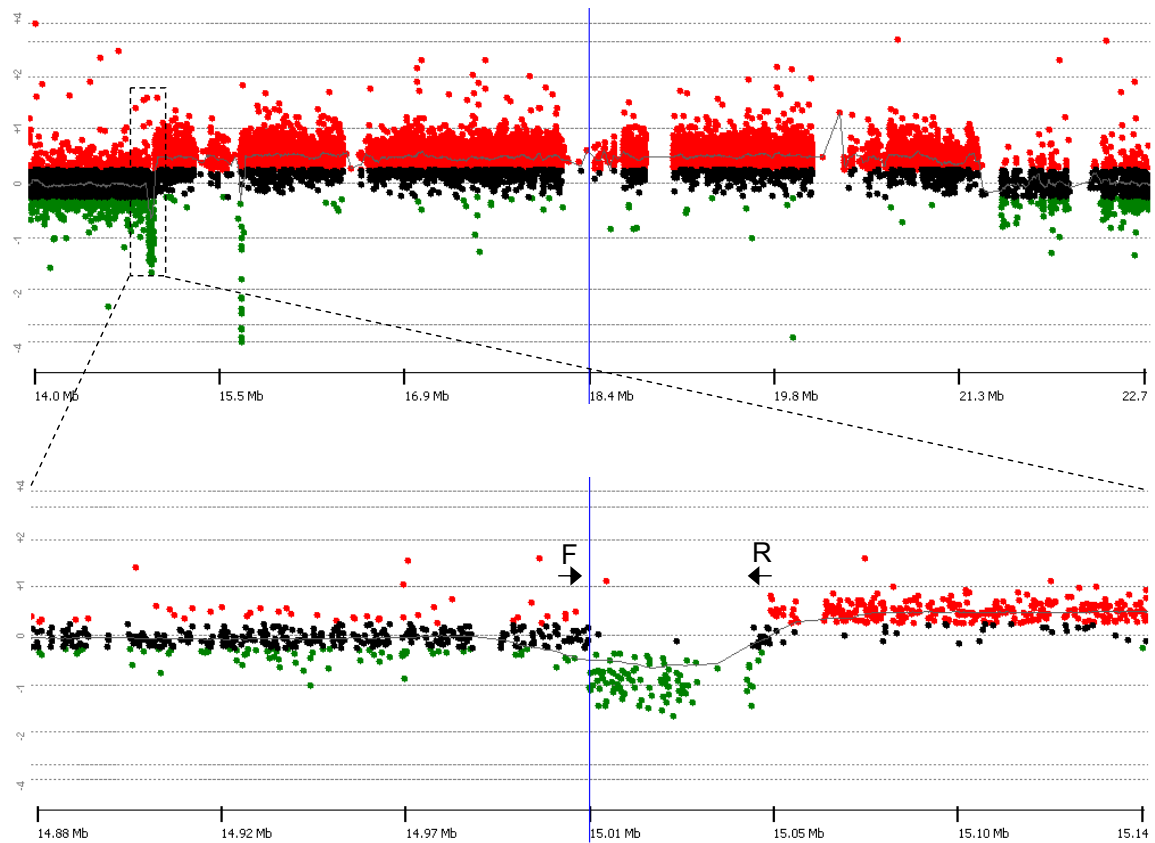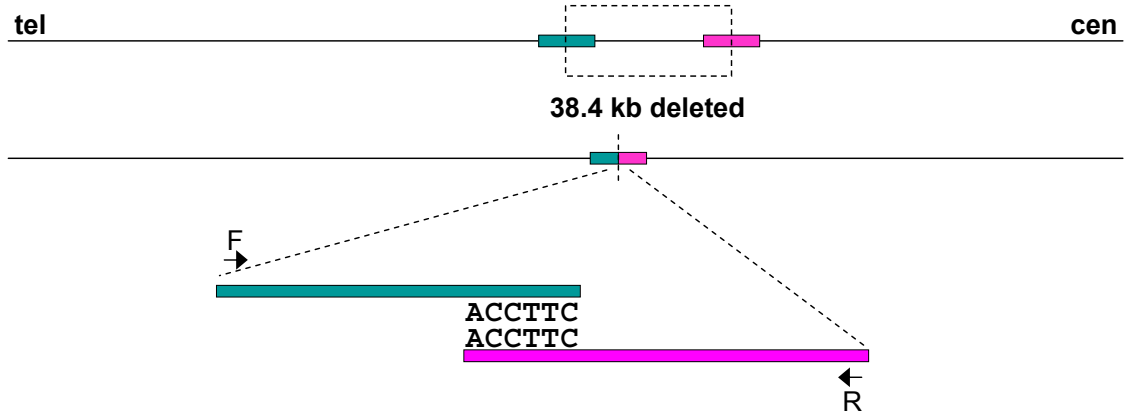

## FoSTeS 1

Dist\_Ref CTCCACATGTGGAATCTCCCCAGACCCCATGACCTTCATACACATTTCCACCATTTCCAGAGCCAGATTT  
 1229 CTCCACATGTGGAATCTCCCCAGACCCCATGACCTTCATGCTTCCTAACAACCACTGAGATAATTTGATAT  
 Prox\_Ref TTAAGTGCAGGGGATTGGAGTCAACATAATTAACCTTCATGCTTCCTAACAACCACTGAGATAATTTGATAT

**Supplementary Figure 5.** Sequence analysis of one junction of a complex rearrangement identified in patient 1229. At this deletion breakpoint, a microhomology of 6 bp (ACCTTC) was found.

Patient 2695

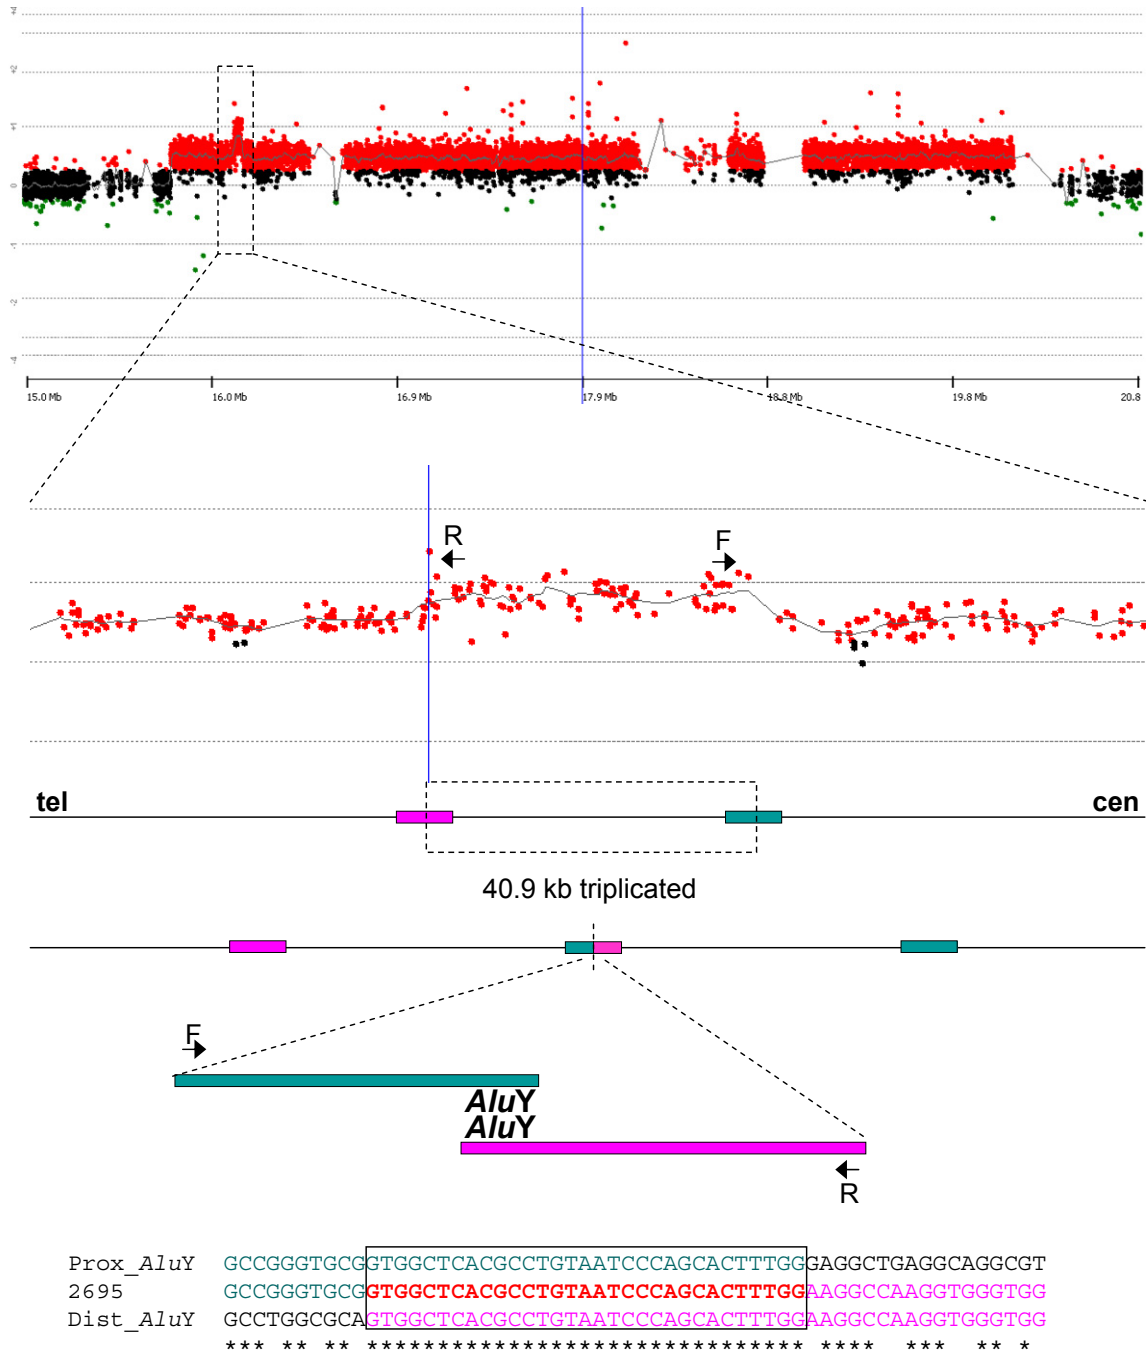

**Supplementary Figure 6.** Junction sequence analysis of the triplicated region in the complex rearrangement in patient 2695. At the breakpoint, there is 31 bp microhomology between two *AluY* elements.

Patient 2711

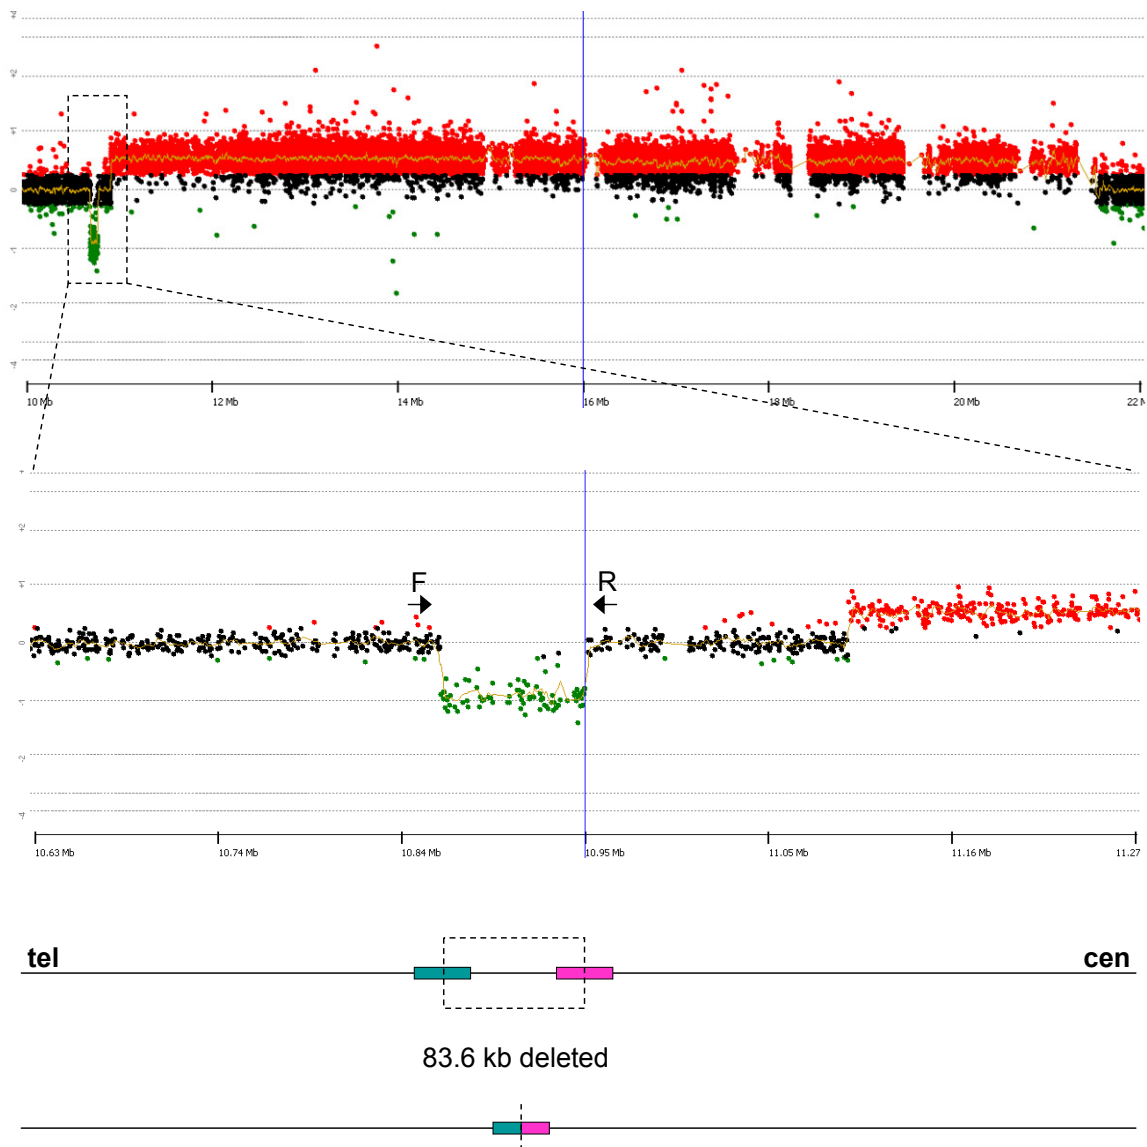

Dist\_Ref AATAAAATCACTGCCCTAGAGCCCTTCTG-ACACTAATGTATGCATGTTTATCTTGCCT  
 2711 AATAAAATCACTGCCCTAGAGCCCTTCTGcAAGGTGGTTAGGGATTGGTGCCTTTTCAG  
 Prox\_Ref TGTGATGGTTTTAGGAGGTGGGGTCTTTGG-AAGGTGGTTAGGGATTGGTGCCTTTTCAG

**Supplementary Figure 7.** Sequence analysis of one junction of the complex rearrangement in patient 2711. A “C” nucleotide was inserted at the deletion breakpoint.

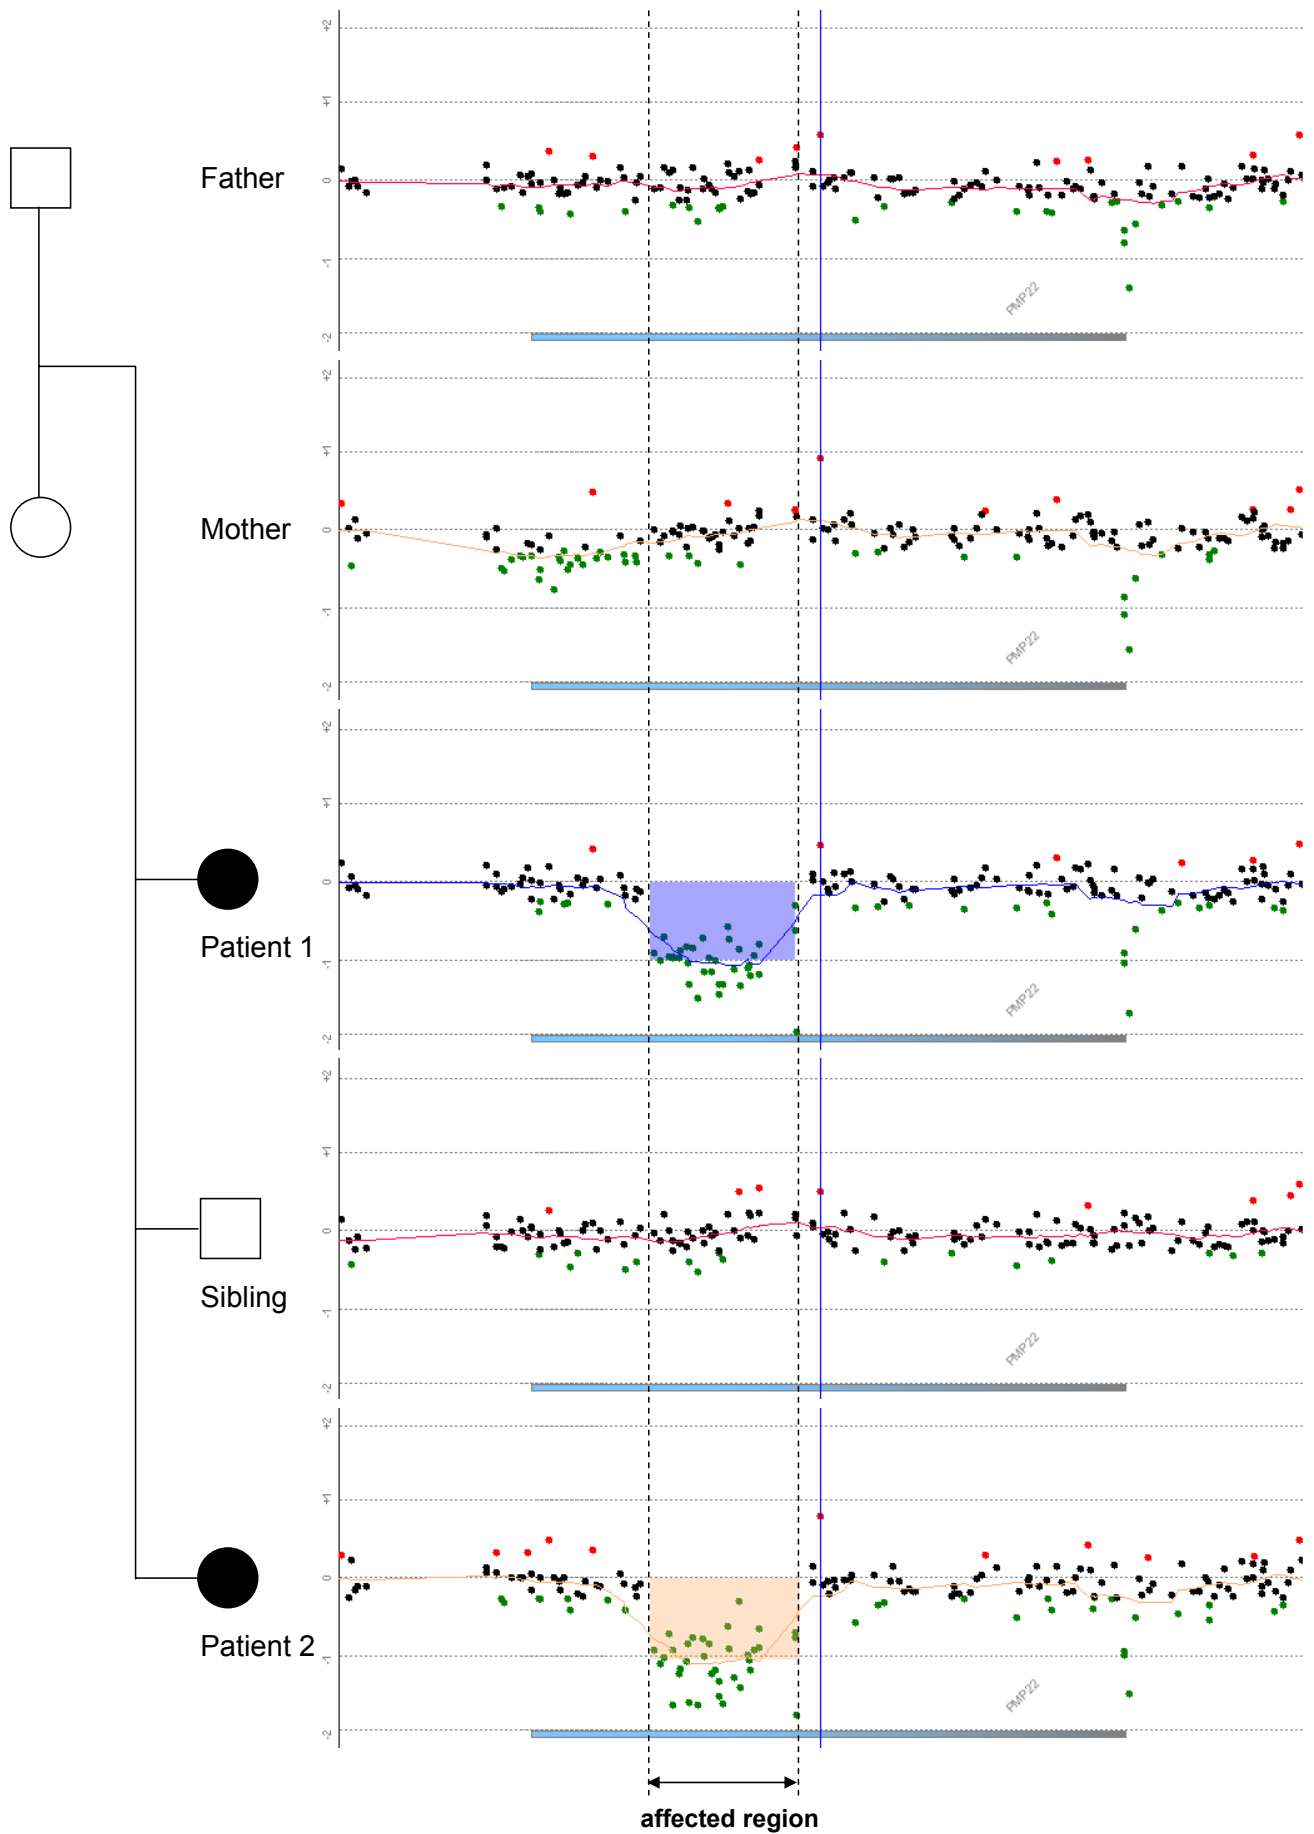

**Supplementary Figure 8.** Oligonucleotide aCGH analysis of the *PMP22* gene region in one CMT1 family. The identical small deletions were identified in two affected siblings. No obvious copy number loss of the deletion region was found in healthy sibling and parents.

### Patient A12

Ref TCGTGGAGACGAAACAGCAGCACCAGCACC**CGCAGC**TGGAGGACGATGATACTCAGCAACAGGAGGAGCAT  
 A12 TCGTGGAGACGAAACAGCAGCACCAGCACC**CGCAGC**-----ATGATACTCAGCAACAGGAGGAGCAT

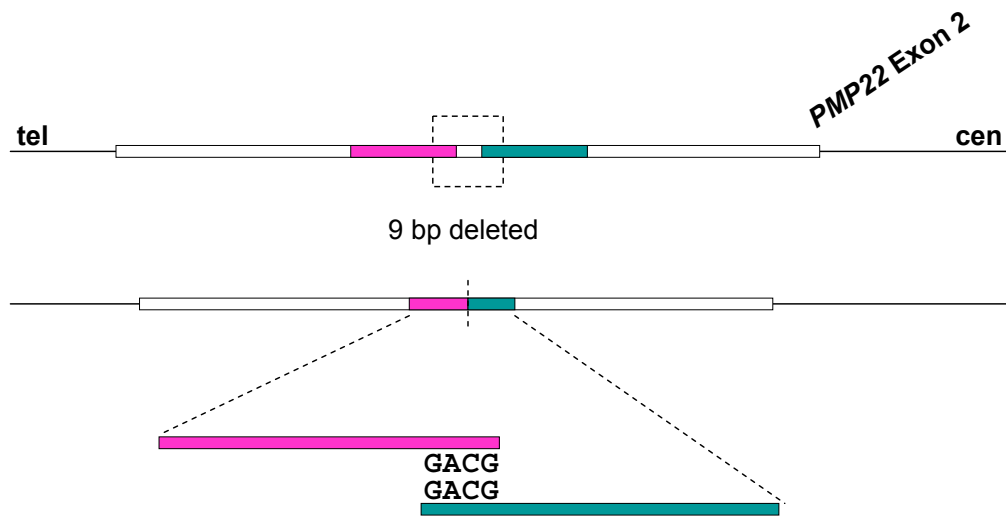

### Patient A14

Dist\_Ref GCACTCACGCTGACGATCGTGGAGACGAAACAGCA**GC**ACCAGCACC**CGCAGC**TGGAGGACGATGATACTCA  
 A14 GCACTCACGCTGACGATCGTGGAGACGAAACAGCA**GC**SCGGTCAGGAGCCTTCGCGCCGCTGCCGCCGA  
 Prox\_Ref CCGGCCTGGCCAGCGCCCGCAGCCCGACCGCC**CGC**SCGGTCAGGAGCCTTCGCGCCGCTGCCGCCGA

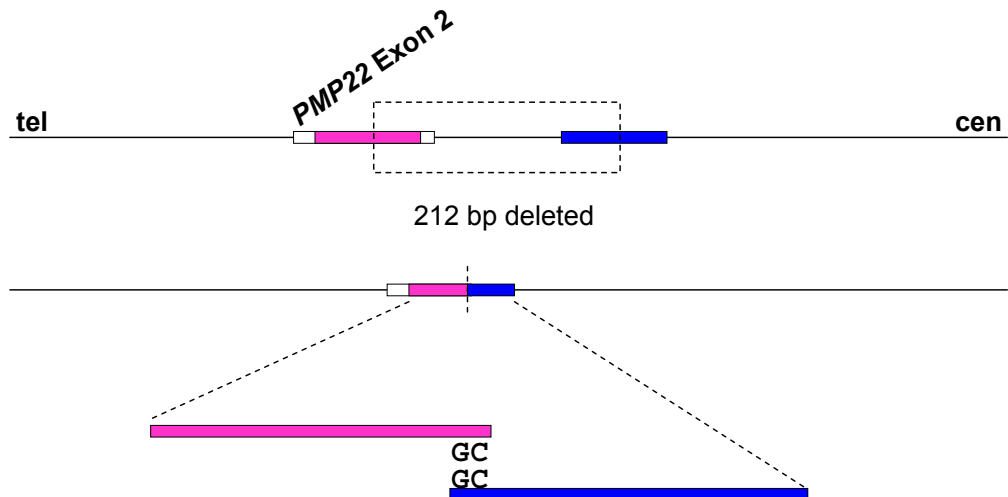

**Supplementary Figure 9.** Junction sequence analysis of small deletions within *PMP22* gene in patient A12 and A14. *PMP22* Exon 2 was represented by a white bar.





## References

1. Perry, G.H. et al. The fine-scale and complex architecture of human copy-number variation. *Am. J. Hum. Genet.* **82**, 685-95 (2008).
2. Gitomer, W.L., Reed, B.Y., Ruml, L.A., Sakhaee, K. & Pak, C.Y. Mutations in the genomic deoxyribonucleic acid for *SLC3A1* in patients with cystinuria. *J. Clin. Endocrinol. Metab.* **83**, 3688-3694 (1998).
3. Li, H., Sun, X.K. & Zhu, X.J. Four novel mutations in *ATP2C1* found in Chinese patients with Hailey-Hailey disease. *Br. J. Dermatol.* **149**, 471-474 (2003).
4. De Baere, E. et al. Spectrum of *FOXL2* gene mutations in blepharophimosis-ptosis-epicanthus inversus (BPES) families demonstrates a genotype--phenotype correlation. *Hum. Mol. Genet.* **10**, 1591-1600 (2001).
5. Dong, J., Gu, T., Jeffords, L. & MacDougall, M. Dentin phosphoprotein compound mutation in dentin sialophosphoprotein causes dentinogenesis imperfecta type III. *Am. J. Med. Genet. A* **132A**, 305-309 (2005).
6. Griffin, A.E. et al. Detection of hemizygoty in Hermansky-Pudlak syndrome by quantitative real-time PCR. *Clin. Genet.* **68**, 23-30 (2005).
7. Bellanne-Chantelot, C. et al. Large genomic rearrangements in the hepatocyte nuclear factor-1beta (*TCF2*) gene are the most frequent cause of maturity-onset diabetes of the young type 5. *Diabetes* **54**, 3126-3132 (2005).
8. Vasickova, P. et al. High occurrence of *BRCA1* intragenic rearrangements in hereditary breast and ovarian cancer syndrome in the Czech Republic. *BMC Med. Genet.* **8**, 32 (2007).
9. Kosugi, S., Okamoto, H., Tamada, A. & Sanchez-Franco, F. A novel peculiar mutation in the sodium/iodide symporter gene in spanish siblings with iodide transport defect. *J. Clin. Endocrinol. Metab.* **87**, 3830-3836 (2002).
10. Sullivan, L.S. et al. Genomic rearrangements of the *PRPF31* gene account for 2.5% of autosomal dominant retinitis pigmentosa. *Invest. Ophthalmol. Vis. Sci.* **47**, 4579-4588 (2006).
11. Morisawa, T. et al. Novel double-deletion mutations of the *OFD1* gene creating multiple novel transcripts. *Hum. Genet.* **115**, 97-103 (2004).
12. Tsuge, I., Matsuoka, H., Abe, T., Kamachi, Y. & Torii, S. Interleukin-2 receptor gamma-chain mutations in severe combined immunodeficiency with B-lymphocytes. *Eur. J. Pediatr.* **155**, 1018-1024 (1996).
13. Kornreich, R., Bishop, D.F. & Desnick, R.J. Alpha-galactosidase A gene rearrangements causing Fabry disease. Identification of short direct repeats at breakpoints in an *Alu*-rich gene. *J. Biol. Chem.* **265**, 9319-9326 (1990).
14. Solera, J., Magallon, M., Martin-Villar, J. & Coloma, A. Factor IXMadrid 2: a deletion/insertion in factor IX gene which abolishes the sequence of the donor junction at the exon IV-intron d splice site. *Am. J. Hum. Genet.* **50**, 434-437 (1992).
15. Tavassoli, K., Eigel, A. & Horst, J. A deletion/insertion leading to the generation

- of a direct repeat as a result of slipped mispairing and intragenic recombination in the factor VIII gene. *Hum. Genet.* **104**, 435-437 (1999).
16. Karsten, S., Voskoboeva, E., Krasnopolskaja, X. & Bondeson, M.L. Novel type of genetic rearrangement in the iduronate-2-sulfatase (*IDS*) gene involving deletion, duplications, and inversions. *Hum. Mutat.* **14**, 471-476 (1999).
  17. Tegay, D.H., Lane, A.H., Roohi, J. & Hatchwell, E. Contiguous gene deletion involving *LICAM* and *AVPR2* causes X-linked hydrocephalus with nephrogenic diabetes insipidus. *Am. J. Med. Genet. A* **143**, 594-598 (2007).
  18. Buyse, I.M. et al. Diagnostic testing for Rett syndrome by DHPLC and direct sequencing analysis of the *MECP2* gene: identification of several novel mutations and polymorphisms. *Am. J. Hum. Genet.* **67**, 1428-1436 (2000).
  19. Chen, J.M., Chuzhanova, N., Stenson, P.D., Ferec, C. & Cooper, D.N. Complex gene rearrangements caused by serial replication slippage. *Hum. Mutat.* **26**, 125-134 (2005).
  20. Chen, J.M., Chuzhanova, N., Stenson, P.D., Ferec, C. & Cooper, D.N. Intrachromosomal serial replication slippage in trans gives rise to diverse genomic rearrangements involving inversions. *Hum. Mutat.* **26**, 362-373 (2005).
  21. Tuzun, E. et al. Fine-scale structural variation of the human genome. *Nat. Genet.* **37**, 727-732 (2005).
